# Supplementary material
Source: publisher site journal article supplement (https://www.dovepress.com/article/355479)
Supplement: Supplementary file 1 [file get_supplementary_file.php]

| **Genes** | **Primer sequences (5’-3’)** | **Accession no.** | **Product size (bp)** |
| --- | --- | --- | --- |
| *CD105* | F: GTCTGCTCTTCACGCTCAGT | NM_001080887 | 219 |
| R: CGAACTCGTTGTTGGCATGG |
| *CD44* | F: CATCGTTGCTGCCCTCCT | NM_204860.3 | 290 |
| R: ACCGCTACACTCCACTCTTCAT |
| *CD90* | F: TTCAGCCTCACCAGACAACAG | NM_204381.2 | 329 |
| R: CACAGGGACACGAAGTCCAC |
| *CD34* | F: ACATCAAACTCGCCACGTCT | XM_015299049.1 | 344 |
| R: TCAGCATCGGTAAATGGGCG |
| *CD45* | F: TCCTTCTCAGATAAGCAGGCAG | XM_015290239 | 200 |
| R: CAACGCCAAACGCCAAGAG |
| *CD133* | F: GAAGTACAGCCTATATACAAGCCGC | XM_015285750.1 | 267 |
| R: CTCATAGTAGATGGCCTGGAGTGT |
| *CD31* | F: GTTCAGCCATCTGCCAAAGTGAAG | XM_004946203.2 | 777 |
| R: GAGGTATTCACCGCTGTCCTCCAG |
| *β-actin* | F: TGACAATGGCTCCGGTATGT | NM_205518.2 | 145 |
| R: GGCTTCATCACCAACGTAGC |

**Table S1 Primers information of cell surface markers**
